# Supplementary material for: A Climatological Perspective on Cyclones and Surface Impacts in the Eastern Mediterranean Using Potential Vorticity-Based Classification
Source: Copernicus journal article supplement (doi:10.5194/egusphere-2025-5979), 2025-12-09
Supplement: Supplementary file [file egusphere-2025-5979-RC1-supplement.pdf]

## **Review of *A Climatological Perspective on Cyclones and Surface Impacts in the Eastern Mediterranean Using Potential Vorticity-Based Classification* by Gens et al.**

In this work, Eastern Mediterranean cyclones are separated into six classes based on their upper-level PV patterns over the region. The resulting classes reveal a clear link between upper-level dynamics, seasonality, and cyclone impacts in terms of mean and extreme precipitation and temperature. The study presents a novel and useful categorisation of Eastern Mediterranean cyclones, is well constructed, and is firmly grounded in the existing literature on the topic. I recommend publication in *Weather and Climate Dynamics* after the following minor revisions are addressed.

### **General Comments**

**Abstract:** The abstract would benefit from shortening and simplification. It is relatively long and contains several lengthy, at times convoluted, sentences that could be improved in terms of clarity and readability.

**Figure 6:** I question the analysis of extremes based on precipitation accumulated and then averaged over such a wide region. In particular when convection plays a role, local precipitation totals can be very high despite relatively modest values of spatial averages over the entire domain. A discussion of this limitation, or an alternative metric that better captures local extremes, would strengthen the analysis. For example, I would suggest applying a similar analysis as this to ERA5 precipitation data, taken by grid-point or aggregated over small (land) regions.

**Figure 7 :** What is the range of top values in the different stations ? You hint to this in the text in lines 330, but I would appreciate a few more details about the distribution. Also, could you compare these results with a similar analysis applied to ERA5 precipitation data ?

### **Specific comments**

Line 33 : « high » instead of « tremendous ». Generally, I would recommend to limit the use of the word « tremendous » in a scientific context.

Line 39 : You can add ref to Chiericoni et al. 2025 [1].

Lines 93-101 : I suggest using present tense, as in the rest of the manuscript.

Line 100 : « outside the 5th or 95th percentile range ».

Line 135 : Is the choice of six clusters subjectively based on the clustering outcome, or is it based on some metrics as in Givon et al. 2024 (described in Appendix A) ?

Line 164 : I understand what you mean with this sentence, but I find the term « rainy seasons » confusing. Consider rephrasing with the following : « The analysis uses annual periods running from 1 August to 31 July instead of calendar years. »

Line 175 : I would suggest « support » instead of « substantiate ».

Line 244 : You can refer to [2] to support your statement.

Lines 277-278: Portal et al. 2025, Figure S4 also shows that lightning frequency (i.e., a proxy of deep convection) conditioned on the presence of cyclones is high in the north-eastern Mediterranean in winter. This agrees with the findings described in the following sentence (lines 278-280).

Line 298 : I would suggest replacing « a trough extending westward » with « a south-west-to-north-east-tilted trough ».

Line 303 : Remove « however ».

Line 390-392 : I suggest the use of present tense.

### **References**

[1] Chiericoni, M., Fosser, G., Flaounas, E. *et al.* Unravelling drivers of the future Mediterranean precipitation paradox during cyclones. *npj Clim Atmos Sci* **8**, 260 (2025).  
<https://doi.org/10.1038/s41612-025-01121-w>

[2] Lavers, D. A., Simmons, A., Vamborg, F., and Rodwell, M. J.: An evaluation of ERA5 precipitation for climate monitoring, *Q. J. Roy. Meteorol. Soc.*, 148, 3152–3165, 2022.
